# Supplementary material for: Influence of Irradiance and Temperature on the Virus MpoV-45T Infecting the Arctic Picophytoplankter Micromonas polaris
Source: MDPI journal article supplement (doi:10.3390/v10120676), 2018-11-29
Supplement: s1 [file s1]

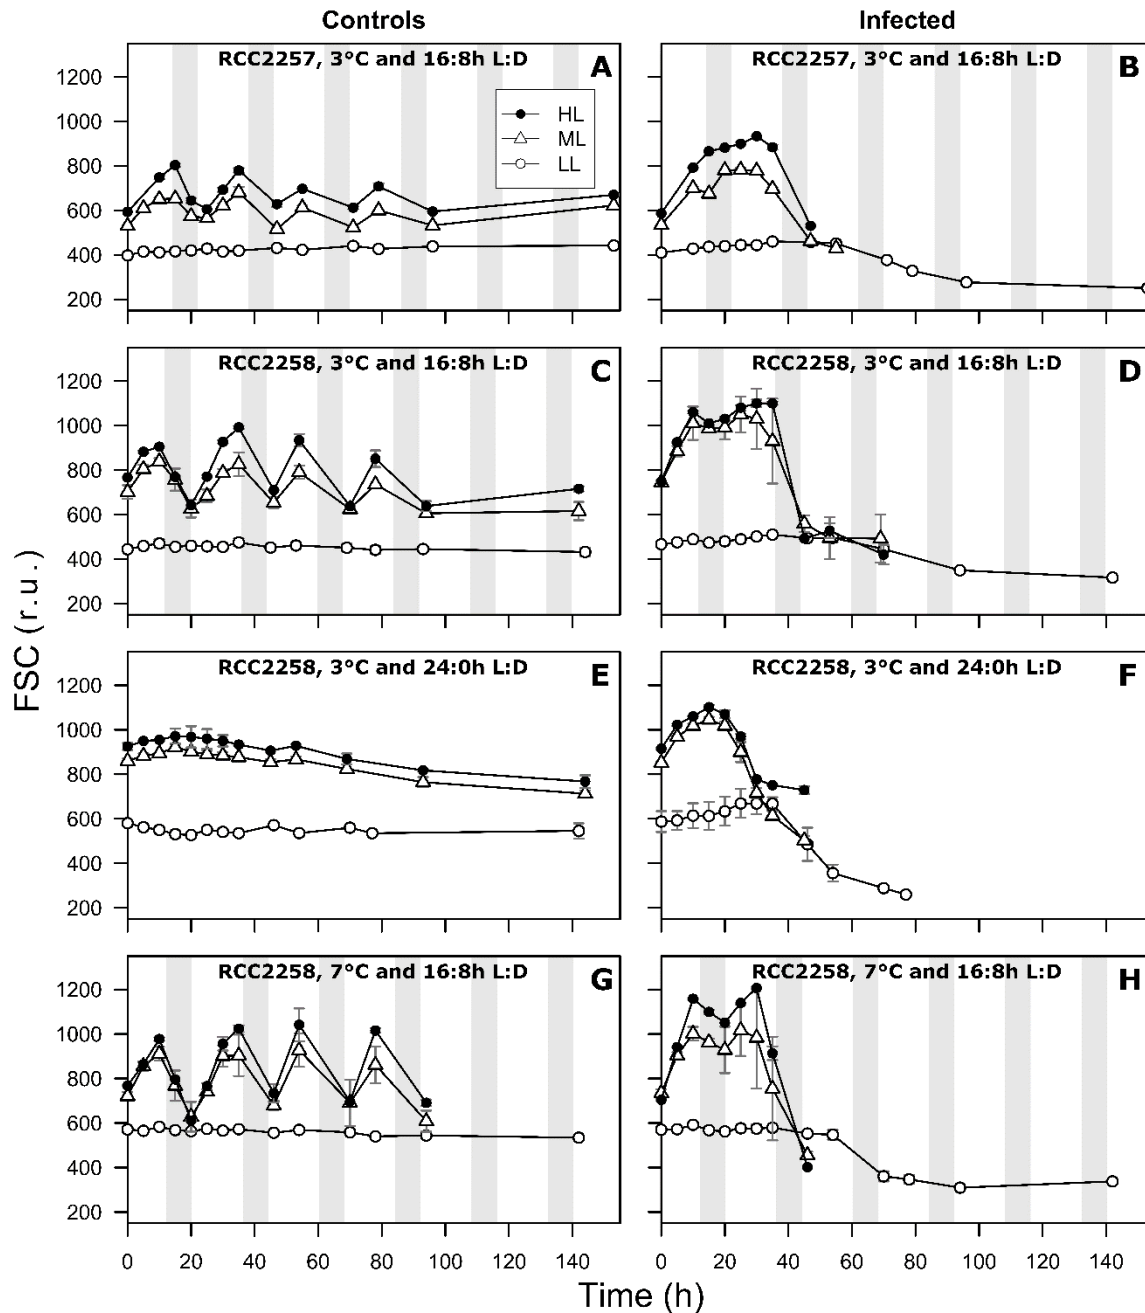

**Figure S1.** Temporal dynamics of cellular forward scatter (FSC) for non-infected controls and MpoV-45T infected *Micromonas polaris* RCC2257 (A, B) and RCC2258 (C-H), cultured at 3 °C (A-F) and 7 °C (G, H), with a 16:8 h (A-D, G, H) and 24:0 h (E,F) light:dark (L:D) cycle and different light intensities (LL, ML and HL, i.e. respectively, 5, 60 and 160  $\mu\text{mol quanta m}^{-2} \text{s}^{-1}$ ). The grey bars represent the 8 h dark period. LL at 3 °C and 16:8 h L:D cycle and ML at 7 °C and 16:8 h L:D have n=4, ML at 3 °C and 16:8 h L:D has n=6, all the other conditions have n=2, error bars represent standard deviation. r.u. stands for relative units. For the controls, the maximum values displayed the interphase of mitosis. During the subsequent night these cells showed a synchronized cell division that lead to a drop in the cellular signals. The continuous light (24:0 h L:D) treatments did not exhibit a distinct diel cycle due to non-synchronized growth. Viral infection halted the diel dynamics of the cellular characteristics.

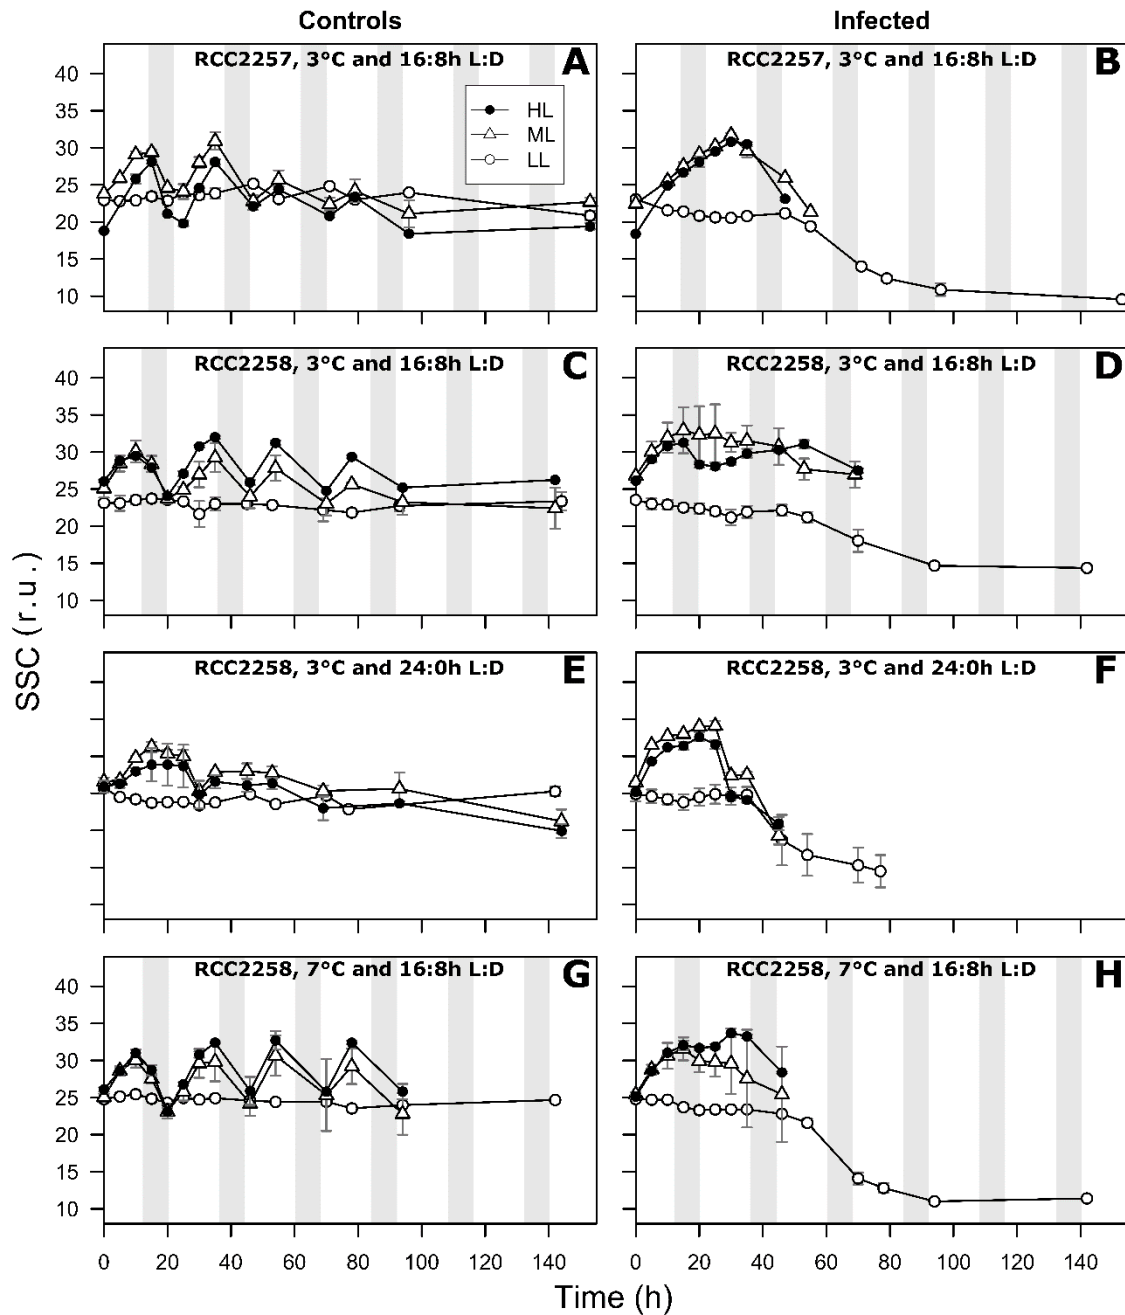

**Figure S2.** Temporal dynamics of cellular side scatter (SSC) for non-infected controls and MpoV-45T infected *Micromonas polaris* RCC2257 (A, B) and RCC2258 (C-H), cultured at 3 °C (A-F) and 7 °C (G, H), with a 16:8 h (A-D, G, H) and 24:0 h (E, F) light:dark (L:D) cycle and different light intensities (LL, ML and HL, i.e. respectively, 5, 60 and 160  $\mu\text{mol quanta m}^{-2} \text{s}^{-1}$ ). The grey bars represent the 8 h dark period. LL at 3 °C and 16:8 h L:D cycle and ML at 7 °C and 16:8 h L:D have n=4, ML at 3 °C and 16:8 h L:D has n=6, all the other conditions have n=2, error bars represent standard deviation. r.u. stands for relative units. For the controls, the maximum values displayed the interphase of mitosis. During the subsequent night these cells showed a synchronized cell division that lead to a drop in the cellular signals. The continuous light (24:0 h L:D) treatments did not exhibit a distinct diel cycle due to non-synchronized growth. Viral infection halted the diel dynamics of the cellular characteristics.

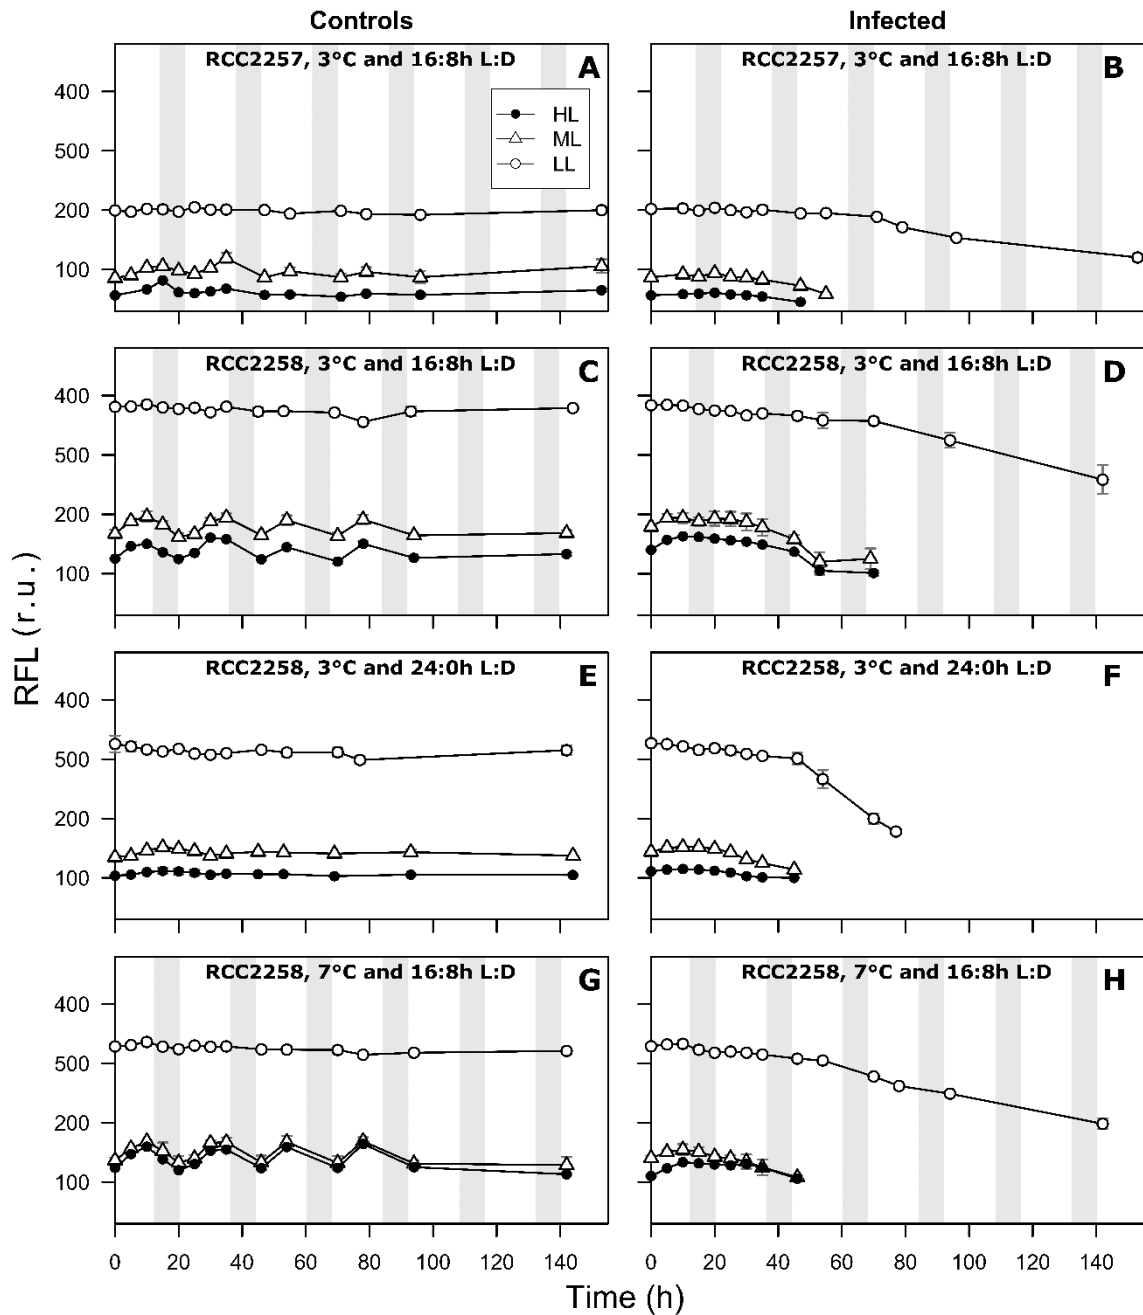

**Figure S3.** Temporal dynamics of cellular chlorophyll red autofluorescence (RFL) for non-infected controls and MpoV-45T infected *Micromonas polaris* RCC2257 (A, B) and RCC2258 (C-H), cultured at 3 °C (A-F) and 7 °C (G, H), with a 16:8 h (A-D, G, H) and 24:0 h (E, F) light:dark (L:D) cycle and different light intensities (LL, ML and HL, i.e. respectively, 5, 60 and 160  $\mu\text{mol quanta m}^{-2} \text{s}^{-1}$ ). The grey bars represent the 8 h dark period. LL at 3°C and 16:8 h L:D cycle and ML at 7 °C and 16:8 h L:D have n=4, ML at 3°C and 16:8 h L:D has n=6, all the other conditions have n=2, error bars represent standard deviation. r.u. stands for relative units. The maximum values displayed the interphase of mitosis. During the subsequent night these cells showed a synchronized cell division that lead to a drop in the cellular signals (Figure S1). The continuous light (24:0 h L:D) treatments did not exhibit a distinct diel cycle due to non-synchronized growth.

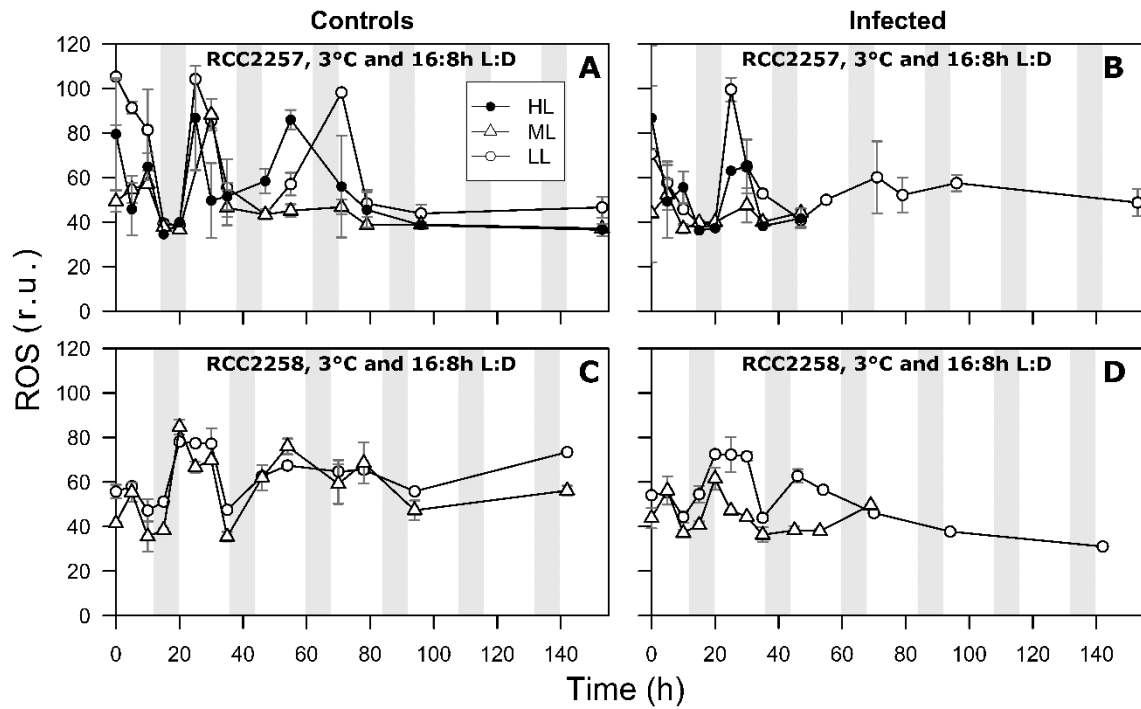

**Figure S4.** Temporal dynamics of cellular reactive oxygen species (ROS) green fluorescence for non-infected controls and MpoV-45T infected *Micromonas polaris* RCC2257 (A, B) and RCC2258 (C, D), cultured at 3 °C with a 16:8 h light:dark (L:D) cycle and different light intensities (LL, ML and HL, i.e. respectively, 5, 60 and 160  $\mu\text{mol quanta m}^{-2} \text{s}^{-1}$ ). The grey bars represent the 8 h dark period. All the conditions have n=2, error bars represent standard deviation. r.u. stands for relative units. The mean cellular ROS also showed a diel cycle with higher signals at the first light of the day, reducing during the day until it reached a minimum during the night.

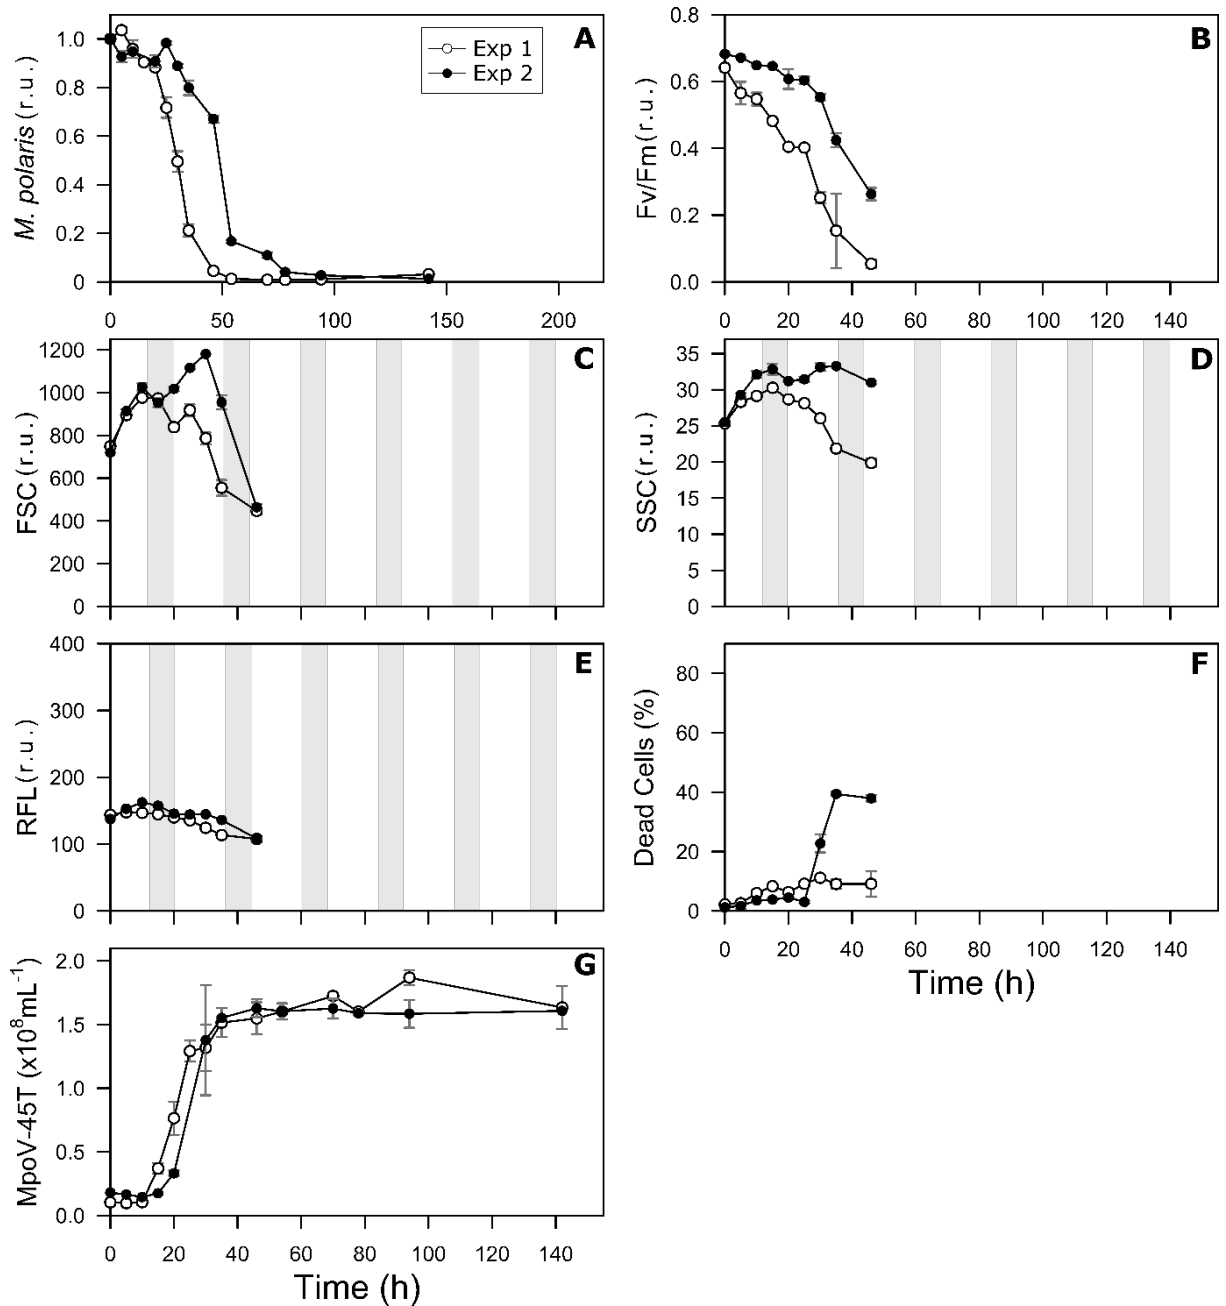

**Figure S5.** Temporal dynamics, during two independent experiments (Exp 1 and Exp 2), of algal abundances (A, normalized to initial abundance), Fv/Fm (B), mean cellular FSC (C), SSC (D) and RFL (E) from infected *Micromonas polaris* RCC2258 cultured at ML light intensity ( $60 \mu\text{mol quanta m}^{-2} \text{ s}^{-1}$ ), 16:8 h light:dark and  $7^\circ\text{C}$ . MpoV-45T abundances were comparable for the two experimental replicates Exp 1 and Exp 2 (G). Error bars represent standard deviation and r.u. stands for relative units.

**Table S1.** Statistical two-way ANOVA of treatments (three levels for light intensity, two levels for light cycle, temperature and host strain) with interaction terms affecting *M. polaris* growth and cellular characteristics. The treatments that were found to significantly influence exponential growth rate, Fv/Fm, FSC, SSC, RFL, and ROS by asterisks: \*, \*\* and \*\*\* represent P-values <0.05, <0.01 and <0.001. n.s. stands for not significant, and NA for not available.

| Host strain | Temp.     | Light cycle | Factor          | Growth | Fv/Fm | FSC | SSC  | RFL | ROS  |
|-------------|-----------|-------------|-----------------|--------|-------|-----|------|-----|------|
| RCC2257     |           |             | Strain          | ***    | n.s.  | *** | ***  | *** | n.s. |
| <i>vs</i>   | 3 °C      | 16:8 h      | Light intensity | ***    | n.s.  | *** | ***  | *** | n.s. |
| RCC2258     |           |             | Interaction     | n.s.   | n.s.  | **  | ***  | *** | n.s. |
|             |           | 16:8 h      | Light cycle     | ***    | **    | *** | **   | *** | NA   |
| RCC2258     | 3 °C      | <i>vs</i>   | Light intensity | ***    | **    | *** | ***  | *** | NA   |
|             |           | 24:0 h      | Interaction     | *      | ***   | **  | n.s. | *** | NA   |
|             | 3 °C      |             | Temperature     | ***    | n.s.  | *** | **   | *** | n.s. |
| RCC2258     | <i>vs</i> | 16:8 h      | Light intensity | ***    | n.s.  | *** | ***  | *** | *    |
|             | 7 °C      |             | Interaction     | ***    | n.s.  | **  | *    | *** | n.s. |

**Table S2.** Statistical two-way ANOVA of treatments (three levels for light intensity, two levels for light cycle, temperature and host strain) with interaction terms affecting infection dynamics for *M. polaris* host (drop in Fv/Fm, start of lysis and full lysis of the culture) and MpoV-45T (latent period, maximum production and burst size). The treatments that were found to be significant are indicated by asterisks: \*, \*\* and \*\*\* represent P-values <0.05, <0.01 and <0.001. n.s. stands for not significant. The Tukey's test following the two-way ANOVA showed consistently that ML and HL were comparable while LL was significantly different from ML and HL (for all tests  $p < 0.0001$ ).

| Host strain | Temp. | Light cycle | Factor          | Drop Fv/Fm | Lysis Start | Full Lysis | Latent Period | Max. Prod. | Burst Size |
|-------------|-------|-------------|-----------------|------------|-------------|------------|---------------|------------|------------|
| RCC2257     |       |             | Strain          | **         | **          | n.s.       | ***           | n.s.       | n.s.       |
| vs          | 3 °C  | 16:8 h      | Light intensity | ***        | ***         | ***        | ***           | ***        | ***        |
| RCC2258     |       |             | Interaction     | **         | ***         | **         | *             | *          | n.s.       |
|             |       | 16:8 h      | Light cycle     | ***        | ***         | ***        | ***           | *          | *          |
| RCC2258     | 3 °C  | vs          | Light intensity | ***        | ***         | ***        | ***           | ***        | ***        |
|             |       | 24:0 h      | Interaction     | n.s.       | ***         | ***        | n.s.          | ***        | n.s.       |
|             | 3 °C  |             | Temperature     | ***        | ***         | *          | ***           | ***        | **         |
| RCC2258     | vs    | 16:8 h      | Light intensity | ***        | ***         | ***        | ***           | ***        | ***        |
|             | 7 °C  |             | Interaction     | n.s.       | **          | n.s.       | *             | *          | n.s.       |
